# Supplementary material for: A novel AIE-active imidazolium macrocyclic ratiometric fluorescence sensor for pyrophosphate anion
Source: Royal Society of Chemistry journal article supplement (doi:10.1039/d2ra00293k), 2022-01-01
Supplement: d2ra00293k1.pdf [file d2ra00293k1.pdf]

## Supporting Information

### A Novel AIE-active imidazolium macrocyclic ratiometric fluorescence sensor for pyrophosphate anion

Jia-Bin Xiong<sup>a,d,\*</sup>, Ding-Ding Ban<sup>a</sup>, Yong-Juan Zhou<sup>a</sup>, Jin-Zhan Li<sup>a</sup>, Si-Ru Chen<sup>a</sup>, Guo-Qun Liu<sup>a\*</sup>, Jing-Jing Tian<sup>c\*</sup>, Li-Wei Mi<sup>a\*</sup> and Dong-Mi Li<sup>b\*</sup>

<sup>a</sup> School of Material and Chemical Engineering, Center for Advanced Materials Research, Zhongyuan University of Technology, Zhengzhou 450007, China;

<sup>b</sup> College of Chemistry and Chemical Engineering, Luoyang Normal University, Luoyang, Henan 471000, P.R. China,

<sup>c</sup> AIE Research Center, Shaanxi Key Laboratory of Phytochemistry, College of Chemistry and Chemical Engineering, Baoji University of Arts and Sciences, Baoji 721013, China.

<sup>d</sup> College of Chemistry, Green Catalysis Center, International Phosphorus Laboratory, International Joint Research Laboratory for Functional Organophosphorus Materials of Henan Province, Zhengzhou University, Zhengzhou 450001, People's Republic of China;

**Materials:** All reagents and solvents were chemical pure (CP) grade or analytical reagent (AR) grade and were used as received unless otherwise specified.

<sup>1</sup>H NMR and <sup>13</sup>C NMR spectra were measured on a Bruker AV 400 spectrometer at 298 K in DMSO-d<sub>6</sub>. Infrared spectra were recorded on BRUKER EQUINAX55 spectrometer. Absorption spectra were recorded on a Hewlett Packard 8453 UV-Vis spectrophotometer. Mass spectrum was measured on an IonSpec 4.7 Tesla FTMS instrument. Fluorescent emission spectra were collected on a Shimadzu RF-5301 fluorophotometer at 298 K.

## Synthesis of the imidazolium macrocycle 1.

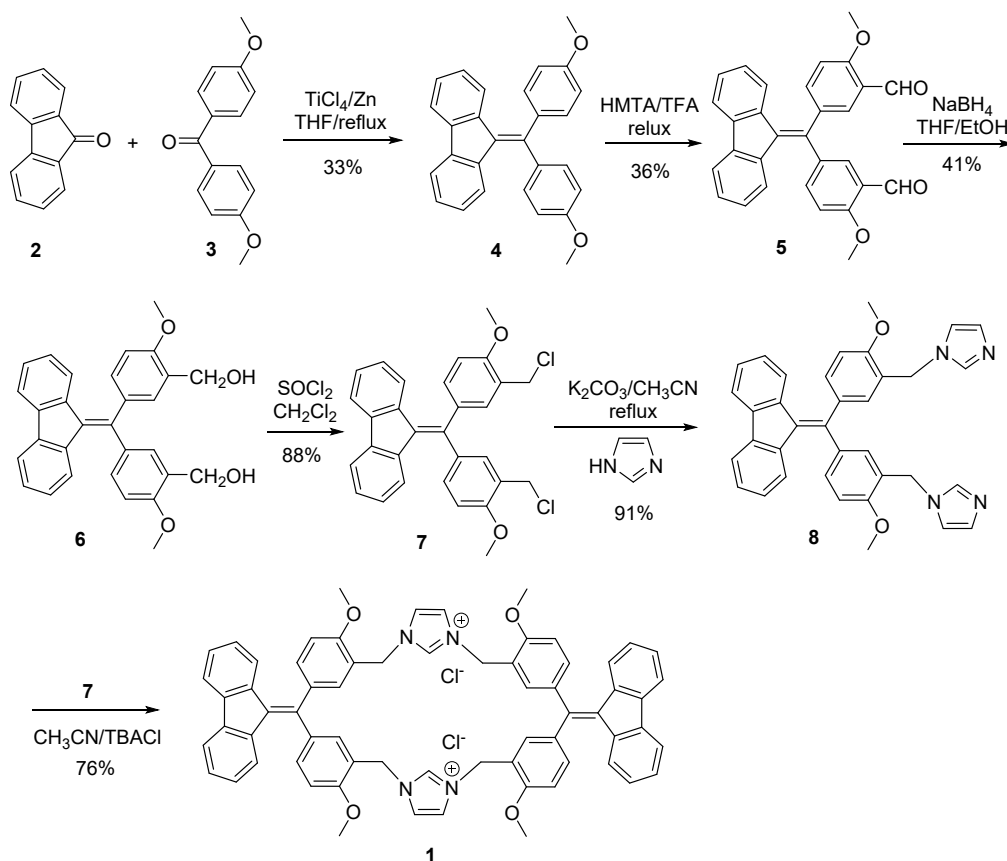

Scheme S1. Synthetic route of the imidazolium macrocycle 1.

**Preparation of the bridged TPE derivative 4:** The preparation was carried out according to literature (*Adv. Mater.* 2011, 23, 3261–3265). To a flask equipped with a magnetic stirrer was charged with zinc dust (16 g, 160 mmol) and THF (100 mL) under nitrogen atmosphere. The mixture was cooled to 0 °C, and  $\text{TiCl}_4$  (8.8 mL, 80 mmol) was added slowly by syringe. After the mixture was heated to reflux for 2.5 h, it was cooled to ambient temperature. Then 4,4'-dimethoxybenzophenone **3** and 9-fluorenone **2** (1:1.5 mole ratio, total 10 mmol) in THF (60 mL) was added, and the mixture was refluxed for 12 h. The reaction was quenched with 10%  $\text{K}_2\text{CO}_3$  aqueous solution (100 mL) followed by extracting with dichloromethane. The organic layer was desiccated with anhydrous sodium sulfate, filtered, and evaporated to dryness under vacuum. The residue was purified by column chromatography to give yellow powders (1.3 g, 33%).

**Preparation of dialdehyde 5:** To a flask charged with **4** (1.0 g, 2.56 mmol), hexamethylenetetramine (3.58 g, 25.6 mmol) and trifluoroacetic acid (20 mL). The resultant mixture was refluxed under stirring for 30 min. After cooled to room temperature and quenched with 15 mL of water, the mixture was stirred for 4 h followed by extracting with dichloromethane ( $3 \times 25$  mL). The combined organic layer was desiccated with anhydrous sodium sulfate, filtered, evaporated to dryness under vacuum. The resultant slurry was purified with column chromatography to give orange red powders (410 mg, 36%).

**Preparation of the dialcohol 6:** To a flask was charged with **5** (410 mg, 0.92 mmol),  $\text{NaBH}_4$  (350 mg, 9.19 mmol) and EtOH / THF (3: 2, V / V, total 25 mL). The mixture was stirred at ambient temperature for 3 h before it was washed with water and extracted with dichloromethane ( $3 \times 25$  mL). The combined organic phase was desiccated with anhydrous sodium sulfate, filtered, and evaporated to dryness under vacuum. The residue was subjected to column chromatography to give yellow powders (170 mg, 41%).

**Preparation of the dichloride 7:** To a flask was charged with **6** (180 mg, 0.4 mmol), pyridine (60  $\mu$ L, 0.8 mmol) and 10 mL of dichloromethane. After stirred at room temperature for 10 min., a solution of  $\text{SOCl}_2$  (0.17 mL) in dichloromethane (5 mL) was added dropwise over 30 min. The mixture was heated at 40  $^\circ\text{C}$  under stirring for 6 h before it was quenched and washed with water. The combined organic phase was desiccated with anhydrous sodium sulfate, filtered, and evaporated to dryness under vacuum. The residue was recrystallized with  $\text{CH}_2\text{Cl}_2$  and MeOH to give yellow solids (172 mg, 88%).

**Preparation of the diimidazole 8:** To a flask was added **7** (96 mg, 0.2 mmol), imidazole (136 mg, 2 mmol), potassium carbonate (54 mg, 0.4 mmol), and redistilled  $\text{CH}_3\text{CN}$  (8 mL). After the mixture was refluxed under stirring for 5 h, it was cooled to room temperature, washed with water, and extracted with dichloromethane ( $3 \times 15$  mL). The combined organic layer was desiccated with anhydrous sodium sulfate, filtered, and evaporated to dryness under vacuum. The residue was purified by column chromatography to give yellow powders (100 mg, 91%). Mp: 204.3–205.7  $^\circ\text{C}$ ;  $^1\text{H}$  NMR (400 MHz,  $\text{CDCl}_3$ )  $\delta$  (ppm) 7.58 (s, 2 H), 7.45 (s, 2 H), 7.23 (d,  $J = 8.6$  Hz, 4 H), 7.09 (s, 2 H), 6.92 (s, 2 H), 6.91 (d,  $J = 8.6$  Hz, 4 H), 6.78 (s, 4 H), 5.13 (s, 4 H), 3.87 (s, 6 H);  $^{13}\text{C}$  NMR (100 MHz,  $\text{CDCl}_3$ )  $\delta$  (ppm) 160.2, 147.4, 140.0, 139.5, 137.4, 135.0, 132.0, 131.9, 129.8, 125.8, 125.0, 119.3, 118.2, 114.1, 55.3, 50.9; FTIR (KBr)  $\nu$  3439, 2929, 1601, 1571, 1506, 1443, 1416, 1389, 1291, 1248, 1175, 1108, 1075, 1028, 906, 820, 737, 663, 630, 598  $\text{cm}^{-1}$ ; ESI $^+$  HRMS  $m/z$  calcd for  $\text{C}_{36}\text{H}_{31}\text{N}_4\text{O}_2$  551.2447 [M+H], found 551.2422 [M+H].

**Preparation of the imidazolium macrocycle 1:** To a flask was added **6** (106 mg, 0.19 mmol), **8** (94 mg, 0.19 mmol) and tetrabutylammonium chloride (268 mg, 0.96 mmol), and acetonitrile (8 mL). After the mixture was refluxed for 12 h under stirring and was cooled to room temperature, the resultant precipitates were collected by filtering and washed with dichloromethane to give red yellow powders (150 mg, 76%). Mp 251.4–253.2  $^\circ\text{C}$ ;  $^1\text{H}$  NMR (400 MHz, DMSO- $d_6$ )  $\delta$  9.36 (s, 2 H), 7.95 (s, 4 H), 7.81 (s, 4H), 7.24 (d,  $J = 8.0$  Hz, 4 H), 7.20 (d,  $J = 8.4$  Hz, 8 H), 7.04 (d,  $J = 8.8$  Hz, 8 H), 6.67 (d,  $J = 8.4$  Hz, 4 H), 5.41 (s, 8 H), 3.84 (s, 12 H);  $^{13}\text{C}$  NMR (100 MHz, DMSO- $d_6$ )  $\delta$  159.8, 147.9, 139.6, 139.4, 139.1, 138.9, 135.7, 134.3, 133.2, 131.2, 131.0, 127.9, 123.9, 122.7, 120.7, 114.3, 55.2, 52.1; IR (KBr)  $\nu$  3398, 3135, 3055, 3004, 2958, 2835, 1595, 1563, 1501, 1447, 1412, 1358, 1290, 1244, 1170, 1142, 1107, 1021, 966, 897, 819, 776, 732, 586, 537, 472  $\text{cm}^{-1}$ ; ESI $^+$  HRMS  $m/z$  calcd for  $\text{C}_{66}\text{H}_{54}\text{ClN}_4\text{O}_4$  1001.3833 [M-Cl], found 1001.3835 [M-Cl].

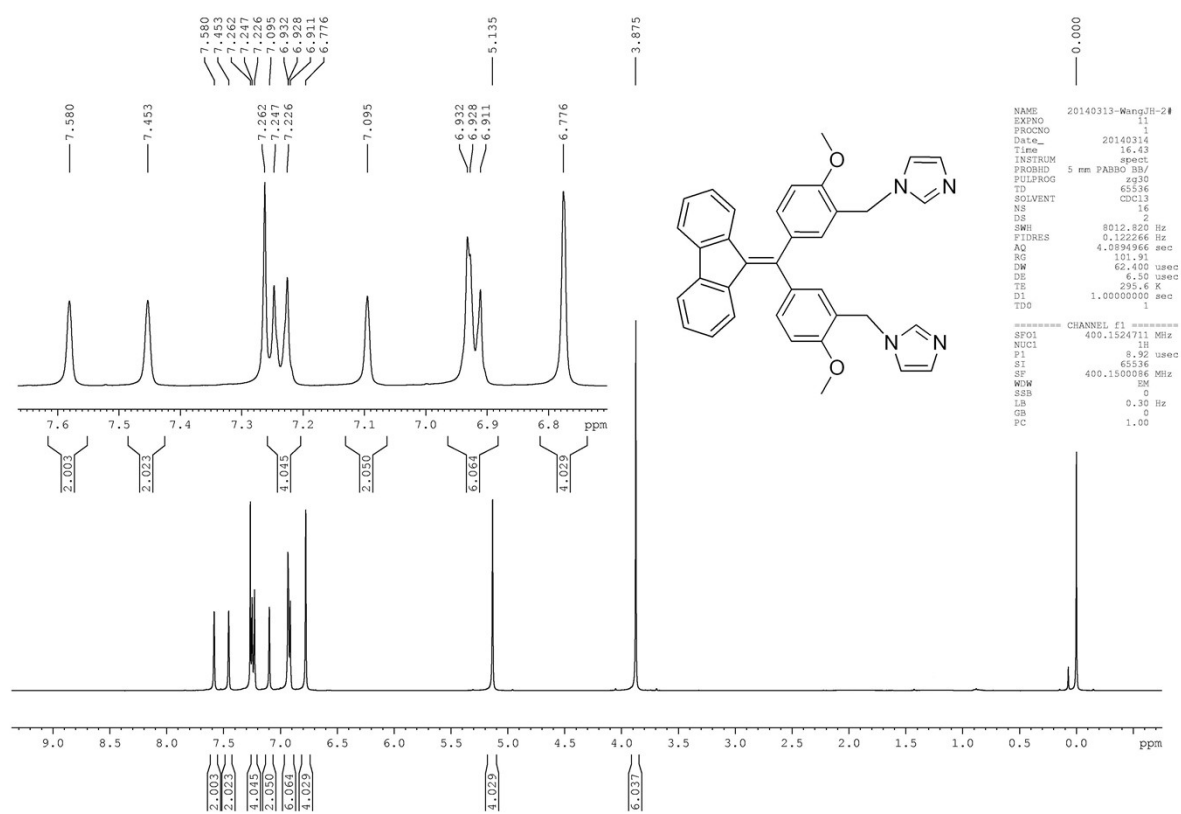

Fig. S1.  $^1\text{H}$  NMR of diimidazole **8** in  $\text{CDCl}_3$ .

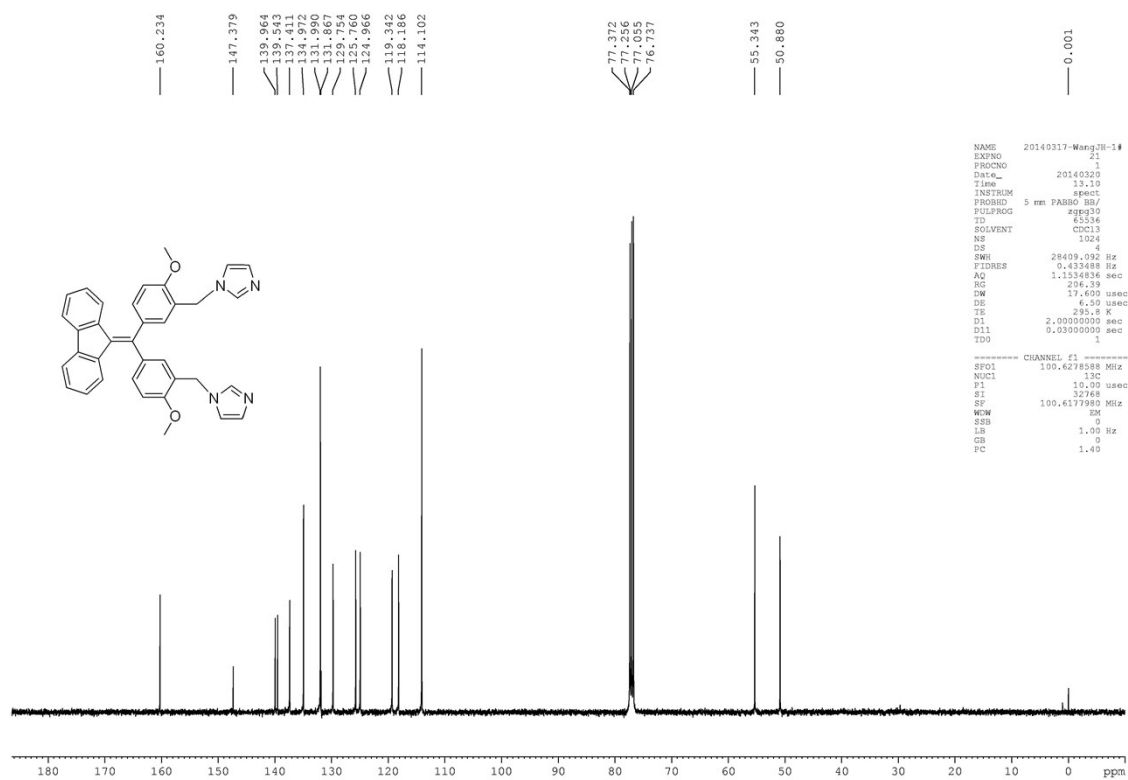

Fig. S2.  $^{13}\text{C}$  NMR of diimidazole **8** in  $\text{CDCl}_3$ .

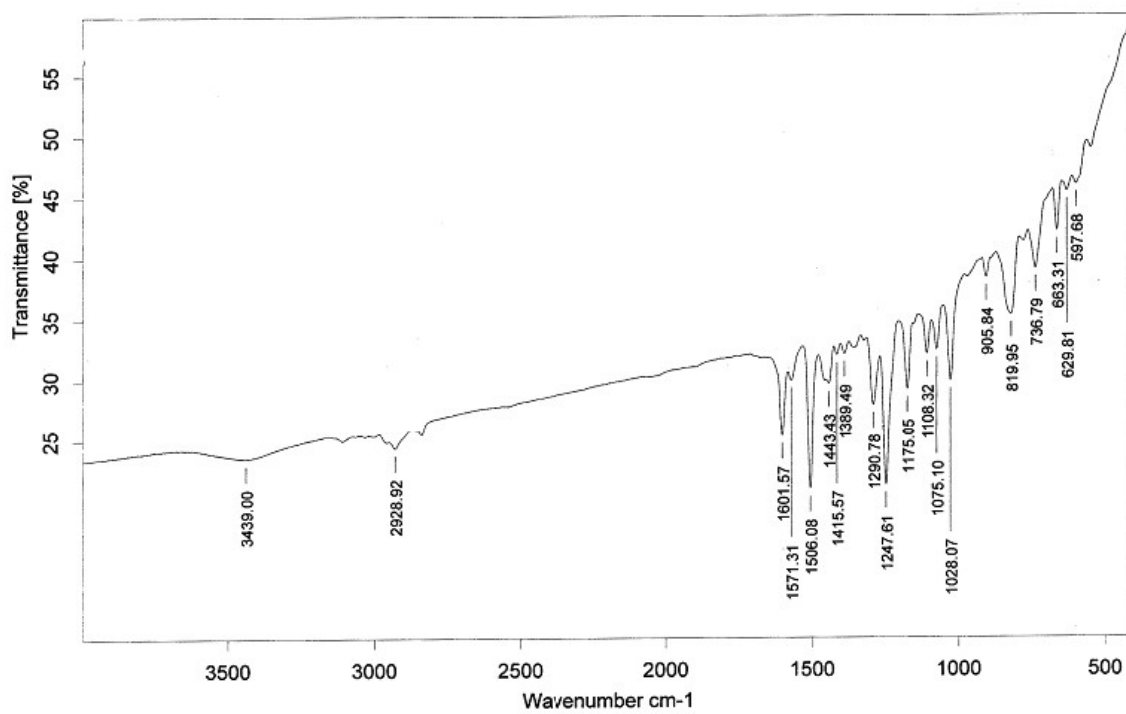

Fig. S3. IR spectrum of diimidazole 8.

### Acquisition Parameter

|             |          |                      |          |                  |           |
|-------------|----------|----------------------|----------|------------------|-----------|
| Source Type | ESI      | Ion Polarity         | Positive | Set Nebulizer    | 0.3 Bar   |
| Focus       | Active   |                      |          | Set Dry Heater   | 180 °C    |
| Scan Begin  | 50 m/z   | Set Capillary        | 4500 V   | Set Dry Gas      | 4.0 l/min |
| Scan End    | 3000 m/z | Set End Plate Offset | -500 V   | Set Divert Valve | Waste     |

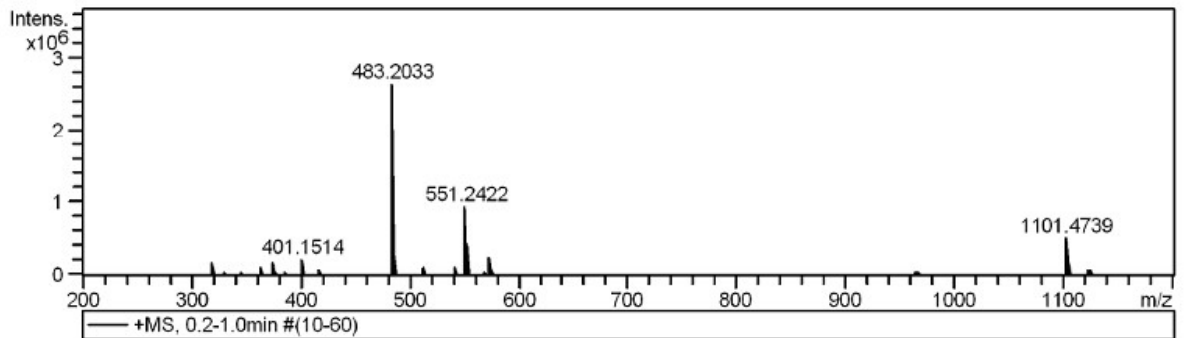

| #  | m/z       | Res.  | S/N    | I       | FWHM   |
|----|-----------|-------|--------|---------|--------|
| 1  | 318.2981  | 15301 | 1011.3 | 186672  | 0.0208 |
| 2  | 362.3242  | 12613 | 493.0  | 106210  | 0.0287 |
| 3  | 375.1300  | 14749 | 853.0  | 191925  | 0.0254 |
| 4  | 401.1514  | 13083 | 913.1  | 223173  | 0.0307 |
| 5  | 416.1744  | 13788 | 329.7  | 84284   | 0.0302 |
| 6  | 483.2033  | 14341 | 8658.7 | 2646627 | 0.0337 |
| 7  | 551.2422  | 15062 | 2854.5 | 941701  | 0.0366 |
| 8  | 573.2232  | 15595 | 816.2  | 246315  | 0.0368 |
| 9  | 966.4442  | 14645 | 279.2  | 27894   | 0.0660 |
| 10 | 1101.4739 | 19307 | 3455.8 | 512196  | 0.0571 |
| 11 | 1123.4535 | 15886 | 593.0  | 92557   | 0.0707 |

Fig. S4. HRMS spectrum of diimidazole **8**.

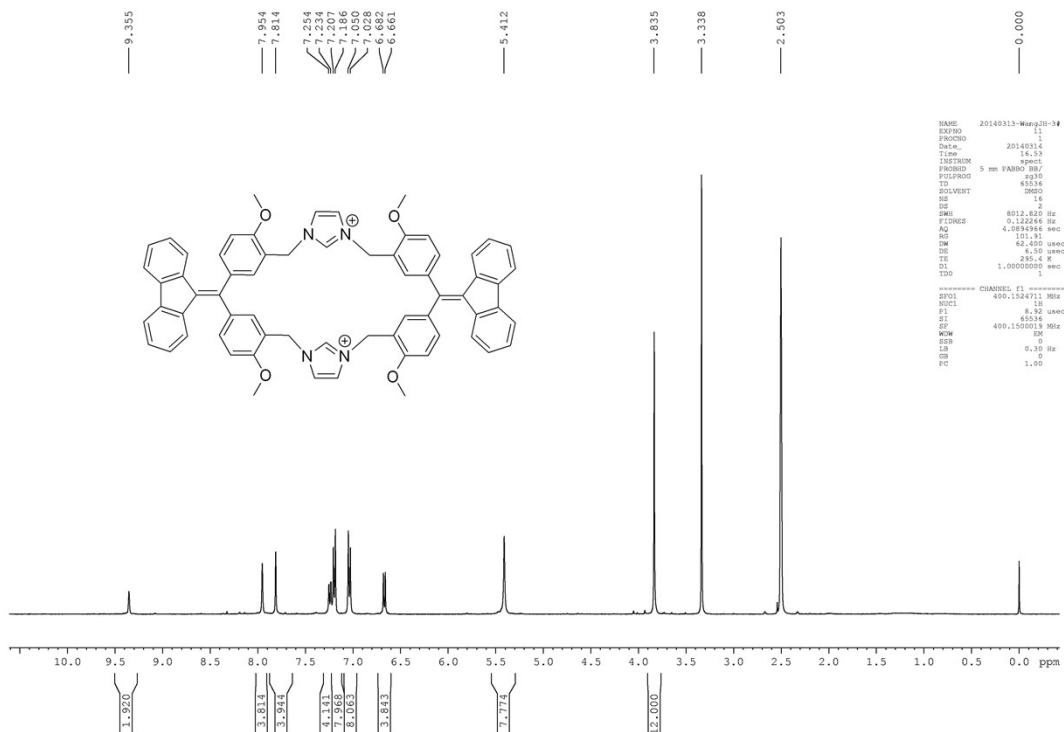

Fig. S5. <sup>1</sup>H NMR of the imidazolium macrocycle **1** in DMSO-d<sub>6</sub>.





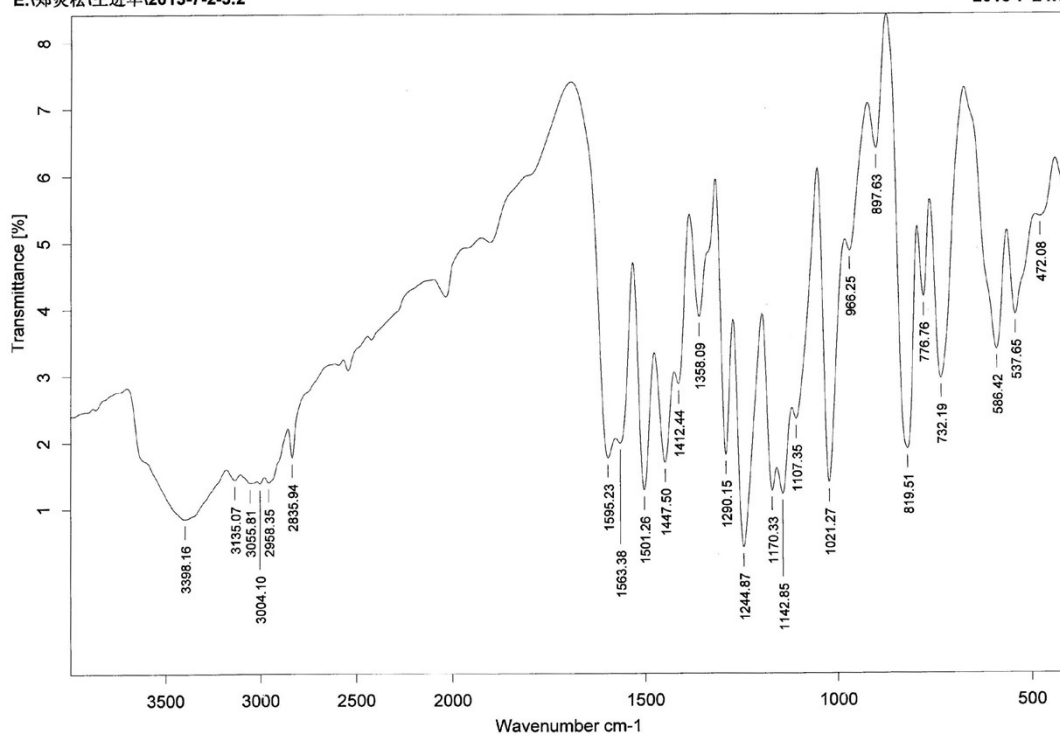

Fig. S7. IR spectrum of the imidazolium macrocycle 1.

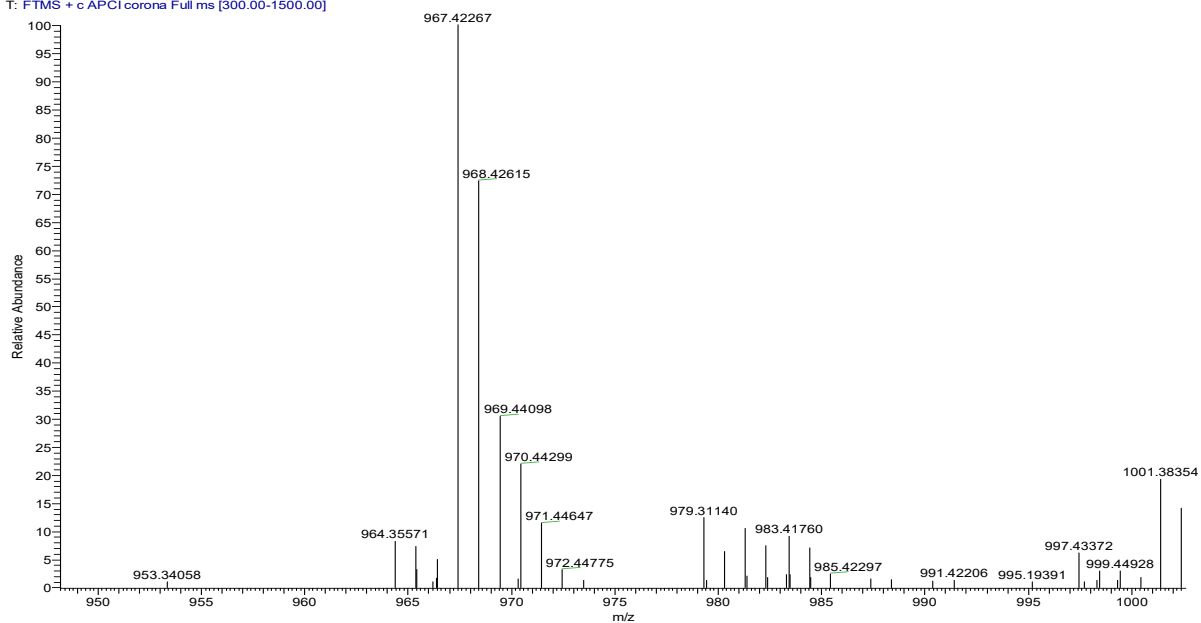

Fig. S8. HRMS spectrum of the imidazolium macrocycle 1.

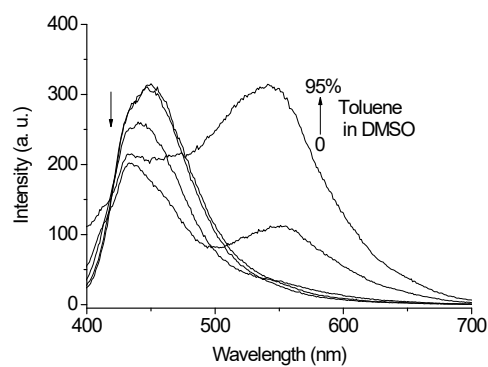

**Fig. S9.** Change of the fluorescence spectra of **1** with volume percentage of toluene in DMSO.  $[1] = 1.0 \times 10^{-5}$  M, volume percentage of toluene in DMSO: 0, 20, 70, 90, and 95;  $\lambda_{\text{ex}} = 378$  nm, ex/em slits = 5/10 nm.

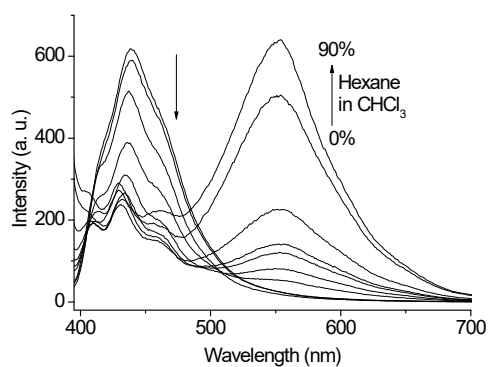

**Fig. S10.** Change of the fluorescence spectra of **1** with hexane fraction in  $\text{CHCl}_3$  containing 2% DMSO.  $[1] = 1.0 \times 10^{-5}$  M,  $\lambda_{\text{ex}} = 378$  nm, ex/em slits = 5/10 nm.

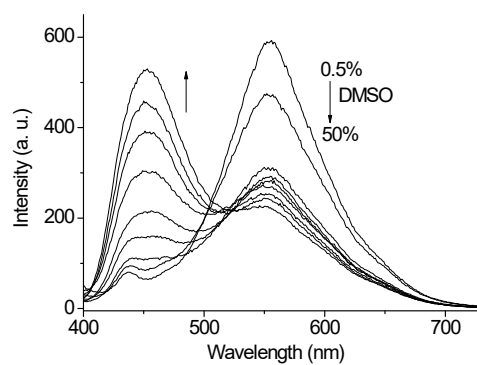

**Fig. S11.** Change of the fluorescence spectra of **1** with DMSO fraction in  $\text{H}_2\text{O}$ .  $[1] = 2.5 \times 10^{-5}$  M,  $\lambda_{\text{ex}} = 378$  nm, ex/em slits = 10/10 nm.

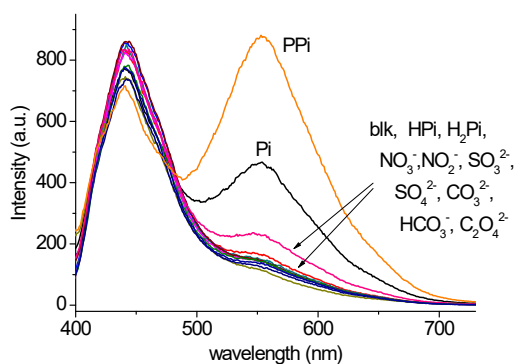

**Fig. S12.** The fluorescence spectra of **1** in water containing 50% DMSO with addition of different anions.  $\lambda_{\text{ex}} = 378 \text{ nm}$ , ex/em slits = 5/10 nm.  $[\mathbf{1}] = 1/2[\text{Anion}] = 5.0 \times 10^{-5} \text{ M}$ .

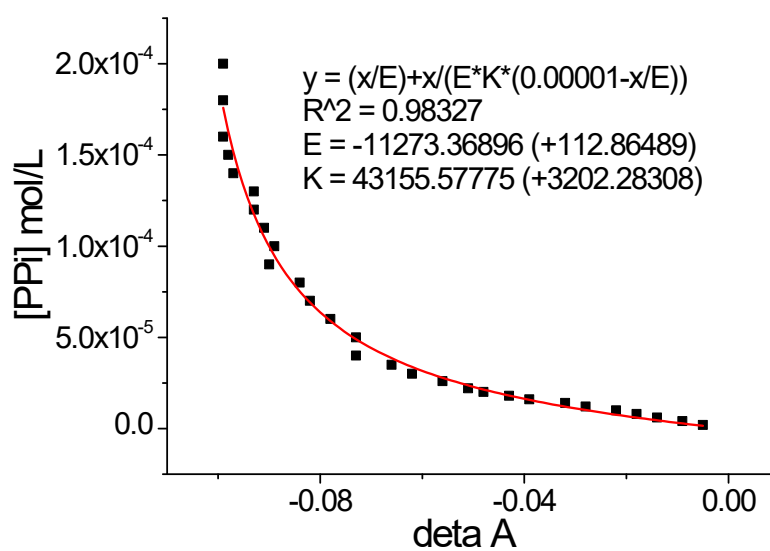

**Fig. S13.** Change of absorbance difference at 253 nm with concentration of ppi. The red curve is the result from fitting.

## Mass Spectrum List Report

### Analysis Info

Analysis Name D:\Data\ZhengYS\zheng-wang-20140611-3.d  
 Method tune\_wide.m  
 Sample Name zheng-wang-20140611-3  
 Comment

Acquisition Date 6/11/2014 10:48:55 AM

Operator BDAL@DE  
 Instrument / Ser# micrOTOF 10401

### Acquisition Parameter

|             |          |                      |          |                  |           |
|-------------|----------|----------------------|----------|------------------|-----------|
| Source Type | ESI      | Ion Polarity         | Positive | Set Nebulizer    | 0.3 Bar   |
| Focus       | Active   |                      |          | Set Dry Heater   | 180 °C    |
| Scan Begin  | 50 m/z   | Set Capillary        | 4500 V   | Set Dry Gas      | 4.0 l/min |
| Scan End    | 3000 m/z | Set End Plate Offset | -500 V   | Set Divert Valve | Waste     |

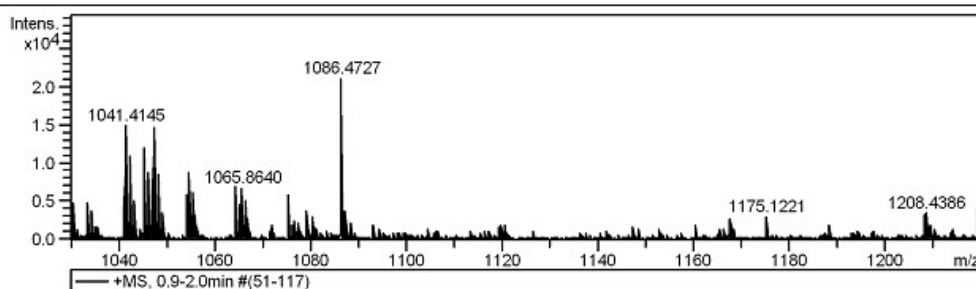

| #  | m/z       | Res.  | S/N   | I     | FWHM   |
|----|-----------|-------|-------|-------|--------|
| 1  | 1041.4145 | 15079 | 115.6 | 14806 | 0.0691 |
| 2  | 1042.4187 | 14384 | 85.5  | 10958 | 0.0725 |
| 3  | 1043.4195 | 16030 | 38.3  | 4912  | 0.0651 |
| 4  | 1065.3651 | 15861 | 34.0  | 4399  | 0.0672 |
| 5  | 1065.8640 | 16513 | 51.6  | 6678  | 0.0645 |
| 6  | 1066.3692 | 16930 | 39.0  | 5052  | 0.0630 |
| 7  | 1086.4727 | 11115 | 161.0 | 21038 | 0.0977 |
| 8  | 1087.4108 | 11656 | 28.6  | 3738  | 0.0933 |
| 9  | 1140.4752 | 13128 | 5.7   | 749   | 0.0869 |
| 10 | 1141.9834 | 12642 | 6.6   | 875   | 0.0903 |
| 11 | 1147.4756 | 11809 | 10.4  | 1372  | 0.0972 |
| 12 | 1148.4435 | 14456 | 9.4   | 1235  | 0.0794 |
| 13 | 1152.9777 | 11561 | 8.7   | 1147  | 0.0997 |
| 14 | 1157.4546 | 14210 | 4.3   | 558   | 0.0815 |
| 15 | 1160.4683 | 12867 | 13.5  | 1763  | 0.0902 |
| 16 | 1165.3382 | 15754 | 10.3  | 1347  | 0.0740 |
| 17 | 1166.4303 | 12453 | 9.8   | 1279  | 0.0937 |
| 18 | 1167.7945 | 12847 | 19.9  | 2599  | 0.0909 |
| 19 | 1168.4551 | 11967 | 9.4   | 1228  | 0.0976 |
| 20 | 1175.1221 | 13022 | 21.9  | 2844  | 0.0902 |
| 21 | 1188.4286 | 11344 | 14.4  | 1859  | 0.1048 |
| 22 | 1193.1221 | 12980 | 4.3   | 554   | 0.0919 |
| 23 | 1193.5953 | 18173 | 5.2   | 665   | 0.0657 |
| 24 | 1194.4550 | 11729 | 7.5   | 966   | 0.1018 |
| 25 | 1197.4390 | 12183 | 8.1   | 1043  | 0.0983 |
| 26 | 1202.9580 | 12394 | 3.5   | 450   | 0.0971 |
| 27 | 1208.4386 | 11992 | 25.9  | 3310  | 0.1008 |
| 28 | 1209.2904 | 14819 | 13.2  | 1690  | 0.0816 |

**Fig. S14.** ESI+ TOF HRMS of compound **1** in the presence of ppi anion. Multiple peaks observed for the 1:1 complex of [1-ppi], such as [M-PPi+3Na<sup>+</sup>]<sup>+</sup> C<sub>66</sub>H<sub>54</sub>N<sub>4</sub>Na<sub>3</sub>O<sub>11</sub>P<sub>2</sub> 1209.2957 found 1209.2904 and [M-PPi+2H<sup>+</sup>+Na<sup>+</sup>]<sup>+</sup> C<sub>66</sub>H<sub>56</sub>N<sub>4</sub>NaO<sub>11</sub>P<sub>2</sub> 1165.3319 found 1165.3382. The observed molecular mass of the 1:1 complex of [1-ppi] indicate its formation.

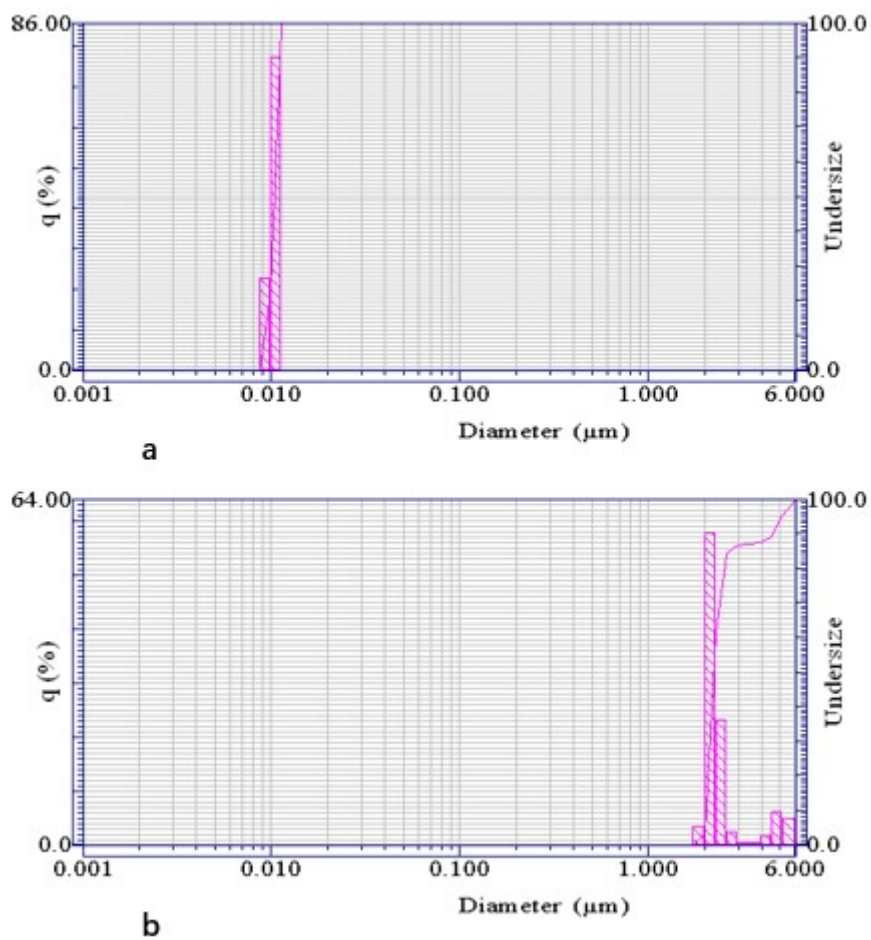

**Fig. S15.** dynamic light scattering (DLS) measurement: (a) compound **1** with addition of ppi anion without the presence of Zn (II) as reference, 0.0103 μm sized aggregates detected, (b) compound **1** with addition of ppi anion in the presence of Zn (II), 2.5714 μm sized aggregates detected which indicate that large aggregates formed in the presence of Zn (II), without the presence of Zn (II), no significant aggregates formed.

| Analytes | Methods      | Reference                                                                               | Detection limit (nM)                       |
|----------|--------------|-----------------------------------------------------------------------------------------|--------------------------------------------|
| PPi      | Fluorescence | Chemical communications, 48(2012), 1784-1786                                            | Compound1/2=1260/2020 nM                   |
|          | Fluorescence | Analytica Chimica Acta, 1034(2018), 119-127                                             | 42 nM                                      |
|          | Fluorescence | Dyes and Pigments, 166(2019), 233–238                                                   | Compound1/2/3/4/5=13.5/22.2/103/184/198 nM |
|          | Fluorescence | Dyes and Pigments, 168 (2019), 205–211                                                  | 72.2 nM                                    |
|          | Fluorescence | Dyes and Pigments, 181(2020). 108553                                                    | Compound1/2=22.3nM /113 nM                 |
|          | Fluorescence | Spectrochimica Acta Part A: Molecular and Biomolecular Spectroscopy, 247(2021), 119073. | 320 nM                                     |
|          | Fluorescence | This work                                                                               | 67 nM                                      |

Table S1: comparison of detection for ppi with literature reports of similar probes:

Note 1: more discussion of the mechanism

The mechanism for the sensing of pyrophosphate anion with probe **1** is further discussed below. The macrocycle **1**, which bear 2 positive charges, has high affinity towards negatively charged anions through electrostatic attraction. Macrocycle **1** has a cavity of size around 6 Å based on a crystal structure of similar macrocycle reported before (reference **9c**, RSC Adv., **2015**, *5*, 60096–60100). The size of cavity of **1** matches very well with the size of pyrophosphate anion (around 5.4 Å). The size fitness between **1** and pyrophosphate anion allow strong binding between **1** and pyrophosphate anion, which has been shown by UV-titration and HRMS analysis. However, this 1:1 association complex has very similar solubility as the probe **1** itself. The fluorescence of **1**, similar as many other compounds with aggregation induced emission characteristics, changes its emission upon formation of aggregates. In here, the inclusion complex [**1**-ppi] does not change much of the solubility which means no significant aggregates are formed. The formation of aggregates, however, could be caused by coordination with Zn (II). The pyrophosphate anion, although included into the cavity of macrocycle **1**, still have the ability to coordinated with Zn (II). This coordination with Zn (II) significantly changed the solubility of the resulting complexes, i.e. formation of aggregates, and hence changed the emission. The formation of aggregation by Zn (II), however, could be many folds. One possibility is that an irregular polymer like coordination complexes formed which naturally leads to large aggregates. Second possibility is that defined complexes formed between Zn (II) and [**1**-ppi], such as (**1**-ppi) Zn, which have low solubility because of charge neutralization.
